# Supplementary material
Source: HighWire-hosted journal article supplement (https://sit.bmj.com/highwire/filestream/539/field_highwire_adjunct_files/1/bmjsit-2022-000156supp002_data_supplement.pdf)
Supplement: bmjsit-2022-000156supp002_data_supplement.pdf [file bmjsit-2022-000156supp002_data_supplement.pdf]

Supplementary Table 2: Hepatic segmentation

| Ref. No. | Author    | Country | Journal                        | Year | Study design | Patient selection                                                                   |           | Imaging techniques |                                         |                         |                                                                                                                                                                       |                                                   | Quantitative measurement | Main endpoints                                                                       | Endpoint measures                                                                                                                                                                                  |                                                                                                                         | Clinical impact, advantages in postoperative outcomes                                                                                                                                                                                                               | Adverse effects | Learning curve | Cost analysis                                                                                                                                                                                                                                                                                                                                                                                            | Other comments                                                                                                                                                                                                                                                   | Ref. detail |
|----------|-----------|---------|--------------------------------|------|--------------|-------------------------------------------------------------------------------------|-----------|--------------------|-----------------------------------------|-------------------------|-----------------------------------------------------------------------------------------------------------------------------------------------------------------------|---------------------------------------------------|--------------------------|--------------------------------------------------------------------------------------|----------------------------------------------------------------------------------------------------------------------------------------------------------------------------------------------------|-------------------------------------------------------------------------------------------------------------------------|---------------------------------------------------------------------------------------------------------------------------------------------------------------------------------------------------------------------------------------------------------------------|-----------------|----------------|----------------------------------------------------------------------------------------------------------------------------------------------------------------------------------------------------------------------------------------------------------------------------------------------------------------------------------------------------------------------------------------------------------|------------------------------------------------------------------------------------------------------------------------------------------------------------------------------------------------------------------------------------------------------------------|-------------|
|          |           |         |                                |      |              | Subject                                                                             | N (cases) | Fluorogenic agent  | Dose                                    | Route                   | Timing                                                                                                                                                                | Imaging system                                    |                          |                                                                                      | Imaging accuracy/success rate                                                                                                                                                                      | Clinical impact, changes in intraoperative decision-making and outcomes                                                 |                                                                                                                                                                                                                                                                     |                 |                |                                                                                                                                                                                                                                                                                                                                                                                                          |                                                                                                                                                                                                                                                                  |             |
| 1        | Aoki      | Japan   | World J Surg                   | 2008 | Prospective  | Open subsegmentectomy or segmentectomy                                              | 35        | ICG                | 5mg/mL                                  | PV injection            | Before liver resection with a Pringle maneuver under ultrasonography                                                                                                  | PDE-2 imaging system (Hamamatsu Photonics)        | NA                       | Visualization of hepatic segments                                                    | 94.3% (Stained subsegments and segments of the liver were identifiable)                                                                                                                            | NA                                                                                                                      | None                                                                                                                                                                                                                                                                | NA              | NA             | Aoki T, Yasuda D, Shimizu Y, Ohtsura M, Niya T, Kusano T, Minamura K, Hayashi K, Murai N, Kotsuna T, Kato H, Ezumi Y, Miwa M, Kusano M. World J Surg. 2008 Aug;32(8):1763-7.                                                                                                                                                                                                                             |                                                                                                                                                                                                                                                                  |             |
| 2        | Aoki      | Japan   | J Hepatobiliary Pancreat Sci   | 2010 | Prospective  | Open subsegmentectomy or segmentectomy                                              | 81        | ICG                | 5mg/mL                                  | PV injection            | Before liver resection                                                                                                                                                | PDE-2 imaging system (Hamamatsu Photonics)        | NA                       | Visualization of hepatic segments                                                    | 90.1% (Stained subsegments and segments of the liver were identifiable)                                                                                                                            | NA                                                                                                                      | None                                                                                                                                                                                                                                                                | NA              | NA             | Detection rate in chlobile liver was 86.6% (3/14). No hepatocetom y performed (only the visualization by was evaluated during cholecyctec tomy). Contrast-enhanced ultrasound was also performed (only the visualization by was evaluated during cholecyctec tomy). Use of the terms "positive" and "negative" staining techniques to indicate fluorescence imaging by PV injection and IV, respectively | Kai K, Sato S, Watanabe T, Endo Y. J Hepatobiliary Pancreat Sci. 2010 Mar;17(2):147-51.                                                                                                                                                                          |             |
| 3        | Kai       | Japan   | J Hepatobiliary Pancreat Sci   | 2010 | Case series  | Laparoscopic cholecystectomy                                                        | 9         | ICG                | NA                                      | Cystic artery injection | After superselective cannulation of the cholecytic artery                                                                                                             | PDE (Hamamatsu Photonics)                         | NA                       | Visualization of hepatic regions perfused by the cholecytic vein                     | 100%                                                                                                                                                                                               | NA                                                                                                                      | None                                                                                                                                                                                                                                                                | NA              | NA             | Kai K, Sato S, Watanabe T, Endo Y. J Hepatobiliary Pancreat Sci. 2010 Mar;17(2):147-51.                                                                                                                                                                                                                                                                                                                  |                                                                                                                                                                                                                                                                  |             |
| 4        | Uchiyama  | Japan   | Langenbecks Arch Surg          | 2011 | Prospective  | Open anatomical hepatectomy for HCC                                                 | 22        | ICG                | 0.5mg/kg                                | IV                      | After portal pedicle ligation                                                                                                                                         | PDE (Hamamatsu Photonics)                         | NA                       | Visualization of hepatic segments                                                    | 100% (vs. 77% by naked-eye observation of ischemic regions)                                                                                                                                        | The estimated volume of the resected specimen and the true weight of the removed specimen was well correlated (R=0.982) | NA                                                                                                                                                                                                                                                                  | None            | None           | NA                                                                                                                                                                                                                                                                                                                                                                                                       | Uchiyama K, Ueno M, Obara S, Kiriya S, Shigakawa Y, Hirano S, Kawai M, Tani M, Yamane H. Langenbecks Arch Surg. 2011 Oct;396(7):1101-7.                                                                                                                          |             |
| 5        | Ishizawa  | Japan   | Arch Surg                      | 2012 | Case series  | Laparoscopic segmentectomy                                                          | 2         | ICG                | 0.025mg/mL (PV injection) 2.5mg (IV)    | PV injection IV         | Following puncture of a PV branch under US guidance (PV injection) After clamping portal pedicle (IV)                                                                 | Prototype laparoscopic system (Olympus)           | NA                       | Visualization of hepatic segments                                                    | 100%                                                                                                                                                                                               | NA                                                                                                                      | NA                                                                                                                                                                                                                                                                  | None            | NA             | NA                                                                                                                                                                                                                                                                                                                                                                                                       | Ishizawa T, Zuker NH, Kokudo N, Gayet B. Arch Surg. 2012 Apr;147(4):393-4.                                                                                                                                                                                       |             |
| 6        | Kawaguchi | Japan   | J Hepatol                      | 2013 | Prospective  | Open liver resection with excision of the major hepatic veins liver transplantation | 63        | ICG                | 0.0025mg/mL of remnant liver volume     | IV                      | After liver resection with excision of the hepatic veins, harvesting of the liver graft (donor surgery), or reconstruction of all hepatic vessels (recipient surgery) | PDE (Hamamatsu Photonics)                         | Fluorescence intensity   | Visualization of veno-occlusive regions and estimation of its portal uptake function | NA                                                                                                                                                                                                 | Boundaries of veno-occlusive regions were visualized on hepatic surfaces according to decrease of portal uptake         | Portal uptake function in veno-occlusive regions is approximately 40% of that in non-veno-occlusive regions The extent of venous occlusion in the remnant liver estimated by fluorescence imaging was correlated with postoperative improvement of posthepatic time | None            | NA             | NA                                                                                                                                                                                                                                                                                                                                                                                                       | Kawaguchi Y, Ishizawa T, Miyata Y, Yamashita S, Masuda K, Sato S, Tamura S, Kaneko J, Sakamoto Y, Aoki T, Hasegawa K, Sugawara Y, Kokudo N. J Hepatol. 2013 Feb;58(2):247-53.                                                                                    |             |
| 7        | Sakoda    | Japan   | J Laparoendosc Adv Surg Tech A | 2014 | Case series  | Laparoscopic segmentectomy                                                          | 2         | ICG                | 5mg/mL                                  | PV injection            | Following puncture of a PV branch under US guidance                                                                                                                   | IRI (Olympus)                                     | NA                       | Visualization of hepatic segments                                                    | 100%                                                                                                                                                                                               | NA                                                                                                                      | NA                                                                                                                                                                                                                                                                  | None            | NA             | NA                                                                                                                                                                                                                                                                                                                                                                                                       | Sakoda M, Ueno S, Iino S, Hironaka K, Minami K, Kawasaki Y, Kurahara H, Matsui Y, Maemura K, Uenotani Y, Shinchi H, Natsugoe S. J Laparoendosc Adv Surg Tech A. 2014 Dec;54(12):e78-83.                                                                          |             |
| 8        | Miyata    | Japan   | J Am Coll Surg                 | 2015 | Prospective  | Open anatomic segmentectomy                                                         | 30        | ICG                | 0.25mg/5mL indigocarmine                | PV injection            | Following puncture of a PV branch under US guidance                                                                                                                   | PDE-neo (Hamamatsu Photonics)                     | NA                       | Visualization of hepatic segments                                                    | 100% (vs. 57% "effective" visualization by conventional indigocarmine method)                                                                                                                      | NA                                                                                                                      | NA                                                                                                                                                                                                                                                                  | None            | N.D.           | NA                                                                                                                                                                                                                                                                                                                                                                                                       | Miyata A, Ishizawa T, Tani K, Shimizu A, Kaneko J, Aoki T, The ICG fluorescence imaging was also used at the end of the hepatic transection procedures in all patients (the interval between the tumor identification by fluorescence imaging was also assessed) |             |
| 9        | Abo       | Japan   | Eur J Surg Oncol               | 2015 | Prospective  | Open anatomical hepatectomy                                                         | 28        | ICG                | 0.25 mg/mL                              | PV injection            | Following puncture of a PV branch                                                                                                                                     | PDE (Hamamatsu Photonics)                         | NA                       | Visualization of hepatic segments                                                    | 89%                                                                                                                                                                                                | NA                                                                                                                      | NA                                                                                                                                                                                                                                                                  | None            | NA             | NA                                                                                                                                                                                                                                                                                                                                                                                                       | Abo T, Nanashima A, Tobinaga S, Hidaka S, Tamura N, Takagi K, Arai J, Miyazaki H, Shibata H, Nagayasu T. Eur J Surg Oncol. 2015 Feb;41(2):257-64.                                                                                                                |             |
| 10       | Ito       | Japan   | Ann Surg                       | 2015 | Case report  | Open anatomical hepatectomy along the right hepatic vein watershed                  | 1         | ICG                | 2.5mg                                   | IV                      | After clamping the right hepatic vein at its root                                                                                                                     | HyperEyeMedical System (Minsho Ika-kogyo Co. Ltd) | NA                       | Visualization of drainage areas by the right hepatic vein                            | 100%                                                                                                                                                                                               | NA                                                                                                                      | NA                                                                                                                                                                                                                                                                  | None            | NA             | NA                                                                                                                                                                                                                                                                                                                                                                                                       | Itoe Y, Saito A, Arita J, Takahashi Y. Ann Surg. 2015 Dec;262(6):e98-9.                                                                                                                                                                                          |             |
| 11       | Ito       | Japan   | Ann Surg                       | 2015 | Prospective  | Open anatomical liver resection                                                     | 24        | ICG                | 2.5mg/5mL indigocarmine (PV) 2.5mg (IV) | PV injection IV         | Following puncture of a PV branch under US guidance (PV injection) After clamping portal pedicle (IV)                                                                 | HyperEyeMedical System (Minsho Ika-kogyo Co. Ltd) | Fluorescence intensity   | Visualizability of hepatic segments based on fluorescence intensity                  | 95.8% (vs. 41.7% by conventional demonstration technique) The contrast index of fusion fluorescence imaging was significantly higher than that of conventional demonstration technique (P < 0.001) | NA                                                                                                                      | NA                                                                                                                                                                                                                                                                  | None            | NA             | NA                                                                                                                                                                                                                                                                                                                                                                                                       | Itoe Y, Arita J, Sakamoto T, Ono Y, Takahashi M, Takahashi Y, Kokudo N, Saito A. Ann Surg. 2015 Jul;262(1):105-11.                                                                                                                                               |             |

|    |           |        |                     |      |               |                                                                |                  |     |                                                      |                    |                                                                                                                                                                                              |                                                         |                        |                                                                                               |                                                                                                    |                                                                                                                                                              |                                                                                                                                                                                                                                                                                             |      |    |    |                                                                                                                                                                                                                                                                                                                                            |
|----|-----------|--------|---------------------|------|---------------|----------------------------------------------------------------|------------------|-----|------------------------------------------------------|--------------------|----------------------------------------------------------------------------------------------------------------------------------------------------------------------------------------------|---------------------------------------------------------|------------------------|-----------------------------------------------------------------------------------------------|----------------------------------------------------------------------------------------------------|--------------------------------------------------------------------------------------------------------------------------------------------------------------|---------------------------------------------------------------------------------------------------------------------------------------------------------------------------------------------------------------------------------------------------------------------------------------------|------|----|----|--------------------------------------------------------------------------------------------------------------------------------------------------------------------------------------------------------------------------------------------------------------------------------------------------------------------------------------------|
| 12 | Kanihara  | Japan  | J Am Coll Surg      | 2015 | Case series   | Open hepatic resection of the right hepatic vein drainage area | 2                | ICG | 0.25mg/kg                                            | IV                 | After the proper hepatic artery and the right hepatic vein were clamped                                                                                                                      | HyperEyeMedical System (Mitsubishi Ika-logica Co., Ltd) | NA                     | Visualization of drainage areas by the right hepatic vein                                     | 100%                                                                                               | NA                                                                                                                                                           | NA                                                                                                                                                                                                                                                                                          | None | NA | NA | Kurihara T, Yamashita Y, Yoshida Y, Takeuchi K, Itoh S, Harimoto N, Yoshizumi T, Shirabe K, Boku T, Matsuura Y. J Am Coll Surg. 2015; Sen:221(1):e49-53.                                                                                                                                                                                   |
| 13 | Kobayashi | Japan  | J Surg Oncol        | 2017 | Prospective   | Open hepatectomy                                               | 105              | ICG | 0.25mg/5nd, indocyanine (PV injection) IV 2.5mg (IV) | PV injection       | Following puncture of a PV branch under US guidance (PV injection) After clamping portal occluder (PV) After clamping the portal pedicle corresponding to the tumor-bearing hepatic segments | PDE (Hamamatsu Photonics)                               | NA                     | Visualizatio of hepatic segments and postoperative outcomes                                   | 100%                                                                                               | NA                                                                                                                                                           | The postoperative total morbidity and mortality rates were 14.3% and 0%, respectively                                                                                                                                                                                                       | None | NA | NA | Kobayashi Y, Kawaguchi Y, Kobayashi K, Mori K, Arita J, Sakamoto Y, Hasegawa K, Kohda N. J Surg Oncol. 2017 Dec;116(7):921-931.                                                                                                                                                                                                            |
| 14 | Terasawa  | Japan  | Surg Endosc         | 2017 | Prospective   | Laparoscopic segmentectomy                                     | 12               | ICG | 1.25mg                                               | IV                 |                                                                                                                                                                                              | PINPOINT (Novadaq)                                      | NA                     | Visualization of hepatic segments                                                             | 100%                                                                                               | NA                                                                                                                                                           | NA                                                                                                                                                                                                                                                                                          | None | NA | NA | Terasawa M, Ishizawa T, Mine Y, Inoue Y, Ito H, Takahashi Y, Sanui A. Surg Endosc. 2017 Dec;31(12):1151-1118.                                                                                                                                                                                                                              |
| 15 | Hong      | Korea  | Surg Endosc         | 2017 | Case report   | Laparoscopic living donor right hemihepatectomy                | 1                | ICG | 0.05mg/kg                                            | IV                 | After closing blood flows to the right hemi liver                                                                                                                                            | NA                                                      | NA                     | Visualization of hepatic segments                                                             | 100%                                                                                               | NA                                                                                                                                                           | NA                                                                                                                                                                                                                                                                                          | None | NA | NA | Fluorescence imaging was also used for identification of hepatic ducts to be divided Hong SK, Suh KS, Kim HS, Yoon KC, Ahn SW, Oh D, Kim H, Yi NJ, Lee KW. Surg Endosc. 2017 Nov;31(11):4834-4835.                                                                                                                                         |
| 16 | Kawaguchi | Japan  | Br J Surg           | 2017 | Prospective   | Liver resection with excision of major hepatic veins           | 21               | ICG | 0.0025mg per ml of total liver volume                | IV                 | After hepatic veins to be resected had been taped and clamped                                                                                                                                | PDE (Hamamatsu Photonics)                               | Fluorescence intensity | Visualization of veno-occlusive/ischemic regions and estimation of its portal uptake function | 100%                                                                                               | Hepatic transection lines were adjusted based on fluorescence imaging at least in 4 patients                                                                 | There were no deaths in hospital or within 30 days. Postoperative complications developed in 6 patients                                                                                                                                                                                     | None | NA | NA | Kawaguchi Y, Nomura Y, Nagai M, Koike D, Sakumoto Y, Ishida T, Ishizawa T, Kohda N, Tanaka W, Be J, Kim H, et al. Br J Surg. 2017 Jun;104(6):e104-1047.                                                                                                                                                                                    |
| 17 | Mizuno    | Japan  | Ann Surg Oncol      | 2017 | Case report   | Laparoscopic segmentectomy                                     | 1                | ICG | NA                                                   | IV                 | After portal pedicle of segment 6 was dissected out                                                                                                                                          | PINPOINT (Novadaq)                                      | NA                     | Visualization of hepatic segments                                                             | 100%                                                                                               | NA                                                                                                                                                           | NA                                                                                                                                                                                                                                                                                          | None | NA | NA | Mizuno T, Shoji R, Yamamoto M, Kang HS, Yamashita S, Aboia TA, Chun YS, Lee JE, Vauthey JN, Conrad C. Ann Surg Oncol. 2017 Aug;24(8):1046-1047.                                                                                                                                                                                            |
| 18 | Zhang     | China  | J Cancer Res        | 2017 | Prospective   | Open hepatectomy                                               | 15               | ICG | 1.2mg (PV injection) 0.25mg/kg (IV)                  | PV injection IV    | After ligation of the PV in the resected liver (PV injection) After clamping the distal PV (IV)                                                                                              | PDE (Hamamatsu Photonics)                               | NA                     | Visualization of hepatic segments                                                             | NA                                                                                                 | NA                                                                                                                                                           | NA                                                                                                                                                                                                                                                                                          | None | NA | NA | Zhang YM, Shi R, Hou JC, Liu ZR, Cui ZL, Li Y, Wu D, Shi Y, Shen ZY. J Cancer Res Clin Oncol. 2017 Jan;143(1):51-58.                                                                                                                                                                                                                       |
| 19 | Meng      | China  | Int J Surg Case Rep | 2018 | Case report   | Laparoscopic living donor right hepatectomy                    | 1                | ICG | 1mg (0.5mg/mL)                                       | PV injection       | After hilar dissection                                                                                                                                                                       | PINPOINT (Stryker)                                      | NA                     | Visualization of hepatic segments                                                             | NA                                                                                                 | NA                                                                                                                                                           | NA                                                                                                                                                                                                                                                                                          | None | NA | NA | Fluorescence imaging was also used for identification of hepatic ducts to be divided Meng X, Wang H, Xu Y, Chen M, Duan W, Lei S. Int J Surg Case Rep. 2018;53:406-409.                                                                                                                                                                    |
| 20 | Nomi      | Japan  | Ann Surg Oncol      | 2018 | Prospective   | Laparoscopic anatomical liver resection                        | 16               | ICG | 1.5mg                                                | IV                 | After he target Glissonian pedicle was identified and temporarily clamped                                                                                                                    | PINPOINT (Stryker)                                      | NA                     | Visualization of hepatic segments                                                             | 100%                                                                                               | NA                                                                                                                                                           | Only one patient encountered the major postoperative complication of fistula, and all the patients attained R0 resection.                                                                                                                                                                   | None | NA | NA | Nomi T, Hokuto D, Yoshikawa T, Matsuo Y, Shio M. Ann Surg Oncol. 2018 Dec;25(11):3982.                                                                                                                                                                                                                                                     |
| 21 | Ueno      | Japan  | Surg Endosc         | 2018 | Case series   | Laparoscopic segmentectomy                                     | 5                | ICG | 0.25mg                                               | Arterial injection | After catheterization into the target arterial branches                                                                                                                                      | PINPOINT (Novadaq)                                      | NA                     | Visualization of hepatic segments                                                             | 100%                                                                                               | NA                                                                                                                                                           | NA                                                                                                                                                                                                                                                                                          | None | NA | NA | Embolec agent was also injected into the arterial branches following injection of ICG solution. This procedure was performed in a hybrid operation. Compared to outcomes of patients without using fluorescence Ueno M, Hayashi S, Sonomura T, Tanaka R, Kawai M, Hiroeno T, Okada KI, Yamashiro H. Surg Endosc. 2018 Feb;32(2):1051-1055. |
| 22 | Nishino   | Japan  | Ann Surg            | 2018 | Prospective   | Open anatomical hepatectomy                                    | 23               | ICG | 0.25mg                                               | PV injection IV    | After puncturing the target portal branches under ultrasound guidance (PV injection) After clamping the glissonian sheaths (IV)                                                              | Medical Imaging Projection System (MIPS, Panasonic)     | NA                     | Visualization of hepatic segments                                                             | 41.3%                                                                                              | In 5 patients, the dissection line, corresponding to the boundary between colored and noncolored areas, was consistent even in the deep regions of the liver | The rate of morbidity was comparable between patients with a use of fluorescence imaging and those without fluorescence imaging. The 1-year disease-free survival rate was, however, higher among patients in the former group, although this difference was not statistically significant. | None | NA | NA | Nishino H, Hatano E, Seo S, Nitta T, Saito T, Nakamura M, Hattori K, Takamori M, Fuji H, Taura K, Uemoto S. Ann Surg. 2018 Jun;267(6):1134-1140.                                                                                                                                                                                           |
| 23 | Peyrat    | France | J Surg Oncol        | 2018 | Prospective   | Anatomical liver resection                                     | 20               | ICG | 40-80mL of 0.0078mg/mL or 0.0156mg/mL                | IV                 | After clamping of the hepatic pedicle                                                                                                                                                        | Fluobeam (Fluoptics)                                    | NA                     | Visualization of hepatic segments                                                             | 80.0%                                                                                              | NA                                                                                                                                                           | NA                                                                                                                                                                                                                                                                                          | None | NA | NA | Peyrat P, Blanc E, Guillemet S, Chen Y, Farlay C, Perel D, Basso V, Riviere M, Depied A. J Surg Oncol. 2018 Aug;117(5):922-927.                                                                                                                                                                                                            |
| 24 | Marino    | Spain  | World J Surg        | 2019 | Retrospective | Robotic liver resection                                        | 25               | ICG | 2.5mg/10nd, (PV injection) 2.5mg (IV)                | PV injection IV    | After puncturing the correspondent segmental portal branch (PV injection) After temporary closure/clamping the corresponding portal branch (IV)                                              | da Vinci Firefly (Intuitive Surgical)                   | NA                     | Visualization of hepatic segments                                                             | 100% for the negative staining method (PV) and 10% for the positive staining method (PV injection) | NA                                                                                                                                                           | The risk of postoperative bile leakage (0% vs. 12%, p = 0.023), R1 resection (0% vs. 16%, p = 0.019) and readmission (p = 0.023) was reduced in the ICG group compared with the no-ICG group.                                                                                               | None | NA | NA | Marino MV, Di Saverio S, Poksh M, Gomez Ruiz M, Gomez Fleitas M. World J Surg. 2019 Oct;43(10):2595-2606.                                                                                                                                                                                                                                  |
| 25 | Marino    | Spain  | J Gastrointest Surg | 2019 | Retrospective | Robotic right hepatectomy                                      | 20 (+20 control) | ICG | 2.5mg/10nd, (PV injection) 2.5mg (IV)                | PV injection IV    | After puncturing the right portal vein (PV injection) After temporary clamping of the targeted portal branch (IV)                                                                            | da Vinci Firefly (Intuitive Surgical)                   | NA                     | Feasibility and operative outcomes                                                            | NA                                                                                                 | NA                                                                                                                                                           | Despite the similar operative time (288 vs 275 min, p = 0.778), the rate of post-operative bile leakage (0% vs 16%, p = 0.002) and the rate of post-hepatectomy liver failure (6% vs 16%, p = 0.034) in the ICG-group were both inferior compared with the non-ICG group.                   | None | NA | NA | Marino MV, Buelles Ramirez S, Gomez Ruiz M. J Gastrointest Surg. 2019 Nov;23(11):2312-2313.                                                                                                                                                                                                                                                |

|    |           |       |                                    |      |               |                                             |                            |     |                                    |                         |                                                                                                                                                 |                                                     |                                                                  |                                                                                                                          |                                                                                                                          |                                                                                                                                         |                                                                                                                                                                                                                                                                                                                                   |      |    |    |                                                                                                                                                                                                                                                                                                       |
|----|-----------|-------|------------------------------------|------|---------------|---------------------------------------------|----------------------------|-----|------------------------------------|-------------------------|-------------------------------------------------------------------------------------------------------------------------------------------------|-----------------------------------------------------|------------------------------------------------------------------|--------------------------------------------------------------------------------------------------------------------------|--------------------------------------------------------------------------------------------------------------------------|-----------------------------------------------------------------------------------------------------------------------------------------|-----------------------------------------------------------------------------------------------------------------------------------------------------------------------------------------------------------------------------------------------------------------------------------------------------------------------------------|------|----|----|-------------------------------------------------------------------------------------------------------------------------------------------------------------------------------------------------------------------------------------------------------------------------------------------------------|
| 26 | Kim       | Korea | J Gastrointest Surg                | 2019 | Case report   | Laparoscopic living donor right hepatectomy | 1                          | ICG | 2.5mg                              | IV                      | After right hepatic artery and portal vein clamping                                                                                             | NA                                                  | NA                                                               | Visualization of hepatic segments                                                                                        | 100%                                                                                                                     | NA                                                                                                                                      | NA                                                                                                                                                                                                                                                                                                                                | None | NA | NA | ICG fluorescence imaging also visualized the running of the biliary tree                                                                                                                                                                                                                              |
| 27 | Ogino     | Japan | Ann Surg Oncol                     | 2019 | Case report   | Laparoscopic left lateral sectionectomy     | 1                          | ICG | NA                                 | IV                      | After clamping the Glissonian pedicle                                                                                                           | NA                                                  | NA                                                               | Visualization of hepatic segments                                                                                        | 100%                                                                                                                     | NA                                                                                                                                      | NA                                                                                                                                                                                                                                                                                                                                | None | NA | NA | Ogino S, Sato S, Okamura S, Ishii T, Fukumitsu K, Ito T, Masui T, Taura K, Kaida T, Uemura S. Ann Surg Oncol. 2019 Jun;26(6):1858.                                                                                                                                                                    |
| 28 | Ueno      | Japan | Surg Laparosc Endosc Percutan Tech | 2019 | Prospective   | Laparoscopic anatomical liver resection     | 10                         | ICG | 0.25mg                             | Arterial injection      | After catheterization into the target arterial branches                                                                                         | PINPOINT (Novadaq)                                  | Contrast index                                                   | Visualization of hepatic segments and correlation of actual resected liver weight with estimated liver resection volumes | 100%<br>Median contrast index value of fluorescence imaging was 1.12, superior to that of indigo carmine (0.21; P=0.005) | NA                                                                                                                                      | Estimated liver resection volume and actual resected liver weight correlated significantly (R=0.906; P<0.01)                                                                                                                                                                                                                      | None | NA | NA | Compared to staining of hepatic segments using indigo-carmine. Compared to staining of hepatic segments using indigo-carmine (75% identification rate)                                                                                                                                                |
| 29 | Nanashima | Japan | World J Surg                       | 2019 | Prospective   | Open hepatectomy                            | 40                         | ICG | 0.25mg/mL                          | PV injection            | After puncturing portal branches                                                                                                                | PDE (Hamamatsu Photonics)                           | NA                                                               | Visualization of hepatic segments                                                                                        | 88% (complete identification)                                                                                            | NA                                                                                                                                      | NA                                                                                                                                                                                                                                                                                                                                | None | NA | NA | Nanashima A, Yano K, Tobinaga S. World J Surg. 2019 May;43(5):1308-1312.                                                                                                                                                                                                                              |
| 30 | Chiba     | Japan | World J Surg                       | 2019 | Prospective   | Open hepatectomy for T2 gallbladder cancer  | 24                         | ICG | NA                                 | Cystic artery injection | After superselective cannulation of the cholecystic artery                                                                                      | HyperteyeMedical System (Minsho Ika-kogyo Co., Ltd) | NA                                                               | Visualization of hepatic lesions perfused by the cholecystic vein and long-term outcomes                                 | 100%                                                                                                                     | NA                                                                                                                                      | 20% microscopic liver metastasis detected in the resected liver. The disease-free survival rate was 59.1% at 5 years and overall survival rate was 86.2% at 5 years                                                                                                                                                               | None | NA | NA | Chiba N, Shimazu M, Ochiai S, Yokozuka K, Goto T, Ochiama M, Sano T, Tomita K, Taniuchi R, Oshima G, Takano K, Abe Y, Hirano H, Kawachi S. World J Surg. 2019 Feb;43(2):608-614. doi: 10.1007/s00764-018-0481-8.                                                                                      |
| 31 | Berardi   | Japan | Ann Surg Oncol                     | 2019 | Case report   | Laparoscopic anatomical segmentectomy       | 1                          | ICG | NA                                 | IV                      | After closing blood flows to S8                                                                                                                 | NA                                                  | NA                                                               | Visualization of hepatic segments                                                                                        | 100%                                                                                                                     | NA                                                                                                                                      | NA                                                                                                                                                                                                                                                                                                                                | None | NA | NA | Berardi G, Wakabayashi G, Igarashi K, Ozaki T, Toyota N, Tsuchiya A, Nishikawa K. Ann Surg Oncol. 2019 Aug;26(8):2577-2578.                                                                                                                                                                           |
| 32 | Lu        | China | Surg Today                         | 2020 | Retrospective | Laparoscopic hepatectomy                    | 237 (anatomical resection) | ICG | 0.5 mg/kg                          | IV                      | NA                                                                                                                                              | PINPOINT (Novadaq)                                  | NA                                                               | Operative outcomes                                                                                                       | NA                                                                                                                       | NA                                                                                                                                      | Operative time and intraoperative blood loss were significantly lower in the fluorescence navigation group. The rate of R0 resection of malignant tumors was comparable in the fluorescence navigation and no-navigation groups, but the wide surgical margin rate was significantly higher in the fluorescence navigation group. | None | NA | NA | Lu H, Gu J, Qian XF, Dai XZ. Surg Today. 2020 Oct 31. doi: 10.1007/s00595-020-02163-8                                                                                                                                                                                                                 |
| 33 | Aoki      | Japan | Surg Oncol                         | 2020 | Case report   | Laparoscopic liver resection                | 1                          | ICG | 0.025mg/mL                         | PV injectio             | After puncturing the correspondent segmental portal branch with guidance from IIOUS and the 3D holoscan needle guide                            | NA                                                  | NA                                                               | Feasibility                                                                                                              | 100%                                                                                                                     | NA                                                                                                                                      | NA                                                                                                                                                                                                                                                                                                                                | None | NA | NA | Aoki T, Koizumi T, Sugimoto M, Murakami M. Surg Oncol. 2020 Dec;35:676-677. doi: 10.1016/j.surco.2020.10.013.                                                                                                                                                                                         |
| 34 | Nishino   | Japan | J Hepatobiliary Pancreat Sci       | 2020 | Prospective   | Open liver resection                        | 10                         | ICG | 0.25-2.5mg                         | IV                      | After clamping the Glissonian sheaths flowing in the cancer-bearing hepatic segment                                                             | Medical Imaging Projection System (MIPS; Panasonic) | Accuracy of hepatectomy was evaluated by fluorescence area ratio | Accuracy of parenchymal division along the plane between hepatic segments                                                | 100%                                                                                                                     | The accurate fluorescence area ratio of the MIPS group and the non-MIPS group was 23.0 ± 12.6% and 5.6 ± 9.5%, respectively (P = .038). | NA                                                                                                                                                                                                                                                                                                                                | None | NA | NA | Accuracy of parenchymal transection guided by MIPS (n=6) was evaluated by comparing the fluorescence area ratios of liver resections in which MIPS was used only before hepatic transection. ICG fluorescence imaging was also used for tumor identification on in the fluorescence navigation system |
| 35 | Zhang     | China | J Gastrointest Surg                | 2020 | Case report   | Laparoscopic hepatectomy                    | 1                          | ICG | 5mg                                | IV                      | After clamping the Glissonian pedicles of target portal territory                                                                               | PINPOINT (stryker)                                  | NA                                                               | Visualization of hepatic segments                                                                                        | 100%                                                                                                                     | NA                                                                                                                                      | NA                                                                                                                                                                                                                                                                                                                                | None | NA | NA | Nishino H, Sato S, Hattori E, Nitta T, Morino K, Toda R, Fukumitsu K, Ishii T, Taura K, Uemura S. J Hepatobiliary Pancreat Sci. 2020 Sep 8. doi: 10.1002/jhpb.824.                                                                                                                                    |
| 36 | Chiew     | Korea | HPB (Oxford)                       | 2020 | Retrospective | Robotic anatomical liver resection          | 52                         | ICG | 2.5mg (PV injection) 5mg (IV)      | PV injection IV         | After puncturing the portal vein branch (PV injection)<br>After pedicle clamping (IV)                                                           | da Vinci Firefly (Intuitive Surgical)               | NA                                                               | Visualization of hepatic segments                                                                                        | 83%                                                                                                                      | Demarcation line visualized by fluorescence imaging was clearer than the ischemic demarcation line in 50% of the patients               | NA                                                                                                                                                                                                                                                                                                                                | None | NA | NA | Chiew AKR, Kho SY, Wee JY, Lee LS, Choi GE. HPB (Oxford). 2021;23:475-482.                                                                                                                                                                                                                            |
| 37 | Procopio  | Italy | HPB (Oxford)                       | 2020 | Prospective   | Open anatomical liver resection             | 15                         | ICG | 0.5mg/kg                           | IV                      | With ultrasound-guided vessel compression                                                                                                       | HyperteyeMedical System (Minsho Ika-kogyo Co., Ltd) | NA                                                               | Visualization of hepatic segments                                                                                        | 100%                                                                                                                     | NA                                                                                                                                      | NA                                                                                                                                                                                                                                                                                                                                | None | NA | NA | Procopio F, Torzilli G, Franchi E, Ciminio M, Vignati L, Donadon M, Dai Fabbro D. HPB (Oxford). 2020 Jun 18;S1365-182X(20)31024-8                                                                                                                                                                     |
| 38 | Xu        | China | Surg Endosc                        | 2020 | Prospective   | Laparoscopic anatomical liver resection     | 36                         | ICG | 0.025mg/mL (PV injection) 5mg (IV) | PV injection IV         | After puncturing the targeted portal branches (PV injection)<br>After occluding the portal vein or Glissonian pedicle of targeted segments (IV) | PINPOINT (stryker)                                  | NA                                                               | Visualization of hepatic segments                                                                                        | 56% for positive staining (PV injection) and 52% for negative staining (IV)                                              | NA                                                                                                                                      | NA                                                                                                                                                                                                                                                                                                                                | None | NA | NA | NA (failure types of positive and negative staining were classified)                                                                                                                                                                                                                                  |

|    |           |       |                              |      |               |                                                                  |                  |     |                                                    |              |                                                                                                                                           |                                                                          |                                                                                                               |                                                                                                                                                                                                            |                                                                             |                                                                                                                                                                                                                                                                                    |                                                                                                 |      |    |                                                                                                                               |                                                                                                                                                                           |                                                                                                                                          |
|----|-----------|-------|------------------------------|------|---------------|------------------------------------------------------------------|------------------|-----|----------------------------------------------------|--------------|-------------------------------------------------------------------------------------------------------------------------------------------|--------------------------------------------------------------------------|---------------------------------------------------------------------------------------------------------------|------------------------------------------------------------------------------------------------------------------------------------------------------------------------------------------------------------|-----------------------------------------------------------------------------|------------------------------------------------------------------------------------------------------------------------------------------------------------------------------------------------------------------------------------------------------------------------------------|-------------------------------------------------------------------------------------------------|------|----|-------------------------------------------------------------------------------------------------------------------------------|---------------------------------------------------------------------------------------------------------------------------------------------------------------------------|------------------------------------------------------------------------------------------------------------------------------------------|
| 39 | Zhai      | China | J Surg Oncol                 | 2020 | Case series   | Laparoscopic liver resection for intrahepatic cholangiocarcinoma | 8                | ICG | 1mg                                                | IV           | After clamping inflow vessels                                                                                                             | PINPOINT (Novadaq)                                                       | NA                                                                                                            | Visualization of hepatic segments                                                                                                                                                                          | 75% (demarcations were obvious until the end of the operation)              | NA                                                                                                                                                                                                                                                                                 | NA                                                                                              | None | NA | NA                                                                                                                            | ICG fluorescence imaging was also used for tumor identification                                                                                                           | Zhai ST, Liang X, Mao QJ, Liang YL, Xu JJ, Chen J, Shi L, Xie YV, Cai XJ. J Surg Oncol. 2020 Aug;122(2):226-233. doi: 10.1002/jso.25940. |
| 40 | Zheng     | China | Ann Surg Oncol               | 2020 | Case report   | Laparoscopic anatomical hepatectomy                              | 1                | ICG | NA                                                 | IV           | After ligating Glissonian pedicle                                                                                                         | NA                                                                       | NA                                                                                                            | Feasibility                                                                                                                                                                                                | 100%                                                                        | NA                                                                                                                                                                                                                                                                                 | NA                                                                                              | None | NA | NA                                                                                                                            | Zheng J, Fang X, Cai J, Tao L, Liang X. Ann Surg Oncol. 2020 Dec;27(13):5179-5180. doi: 10.1245/s10434-020-08952-6.                                                       |                                                                                                                                          |
| 41 | Miyashita | Japan | Surg Today                   | 2020 | Retrospective | Open liver resection                                             | 10               | ICG | 0.025mg/5mL indocyanine (PV injection) 0.25mg (IV) | PV injection | After puncturing the portal branch of the tumor-bearing hepatic segment (PV injection) After clamping the Glisson (IV)                    | LIGHTVISION (Shimadzu Corporation)                                       | NA                                                                                                            | Visualizatio of hepatic segments                                                                                                                                                                           | 100%                                                                        | NA                                                                                                                                                                                                                                                                                 | NA                                                                                              | None | NA | NA                                                                                                                            | ICG fluorescence imaging was also used for tumor identification                                                                                                           | Miyashita S, Hattori E, Tada M, Okada T. Surg Today. 2020 Oct;50(10):1308-1313. doi: 10.1007/s00595-020-02005-7.                         |
| 42 | Unemura   | Japan | Case Rep Gastroenterol       | 2020 | Case report   | Laparoscopic extended cholecystectomy                            | 1                | ICG | 2.5mg                                              | IV           | After clamping the hilar Glissonian pedicles distal to the cystic artery                                                                  | NA                                                                       | NA                                                                                                            | Visualization of cystic vein perfusion area in the liver                                                                                                                                                   | 100%                                                                        | NA                                                                                                                                                                                                                                                                                 | NA                                                                                              | None | NA | NA                                                                                                                            | Unemura A, Nitta H, Takahara T, Hasegawa Y, Katagiri H, Kanno S, Ando T, Kobayashi M, Sasaki A. Case Rep Gastroenterol. 2020 Feb 7;6:1411-14115.                          |                                                                                                                                          |
| 43 | Yao       | China | J Cancer                     | 2020 | Retrospective | Open right hemihepatectomy for HCC                               | 18 (+29 control) | ICG | 2.5mg (2.5mg/mL) (PV injection) 2.5mg (IV)         | PV injection | After puncturing the right branch of portal vein (PV injection) After dividing the right hepatic artery and portal branch (IV)            | NA                                                                       | NA                                                                                                            | Visualization of hepatic segments and operative outcomes                                                                                                                                                   | 100%                                                                        | NA                                                                                                                                                                                                                                                                                 | None                                                                                            | NA   | NA | Navigation surgery did not result in an increase in costs.                                                                    | Yao S, Zhang L, Ma J, Jia W, Chen H, J. Cancer. 2020 Feb 10;11(9):2465-2475.                                                                                              |                                                                                                                                          |
| 44 | Kubo      | Japan | J Hepatobiliary Pancreat Sci | 2020 | Retrospective | Hepatic resection of the right hepatic vein drainage area        | 12               | ICG | 2.5mg                                              | IV           | After clamping the right hepatic vein                                                                                                     | HyperEyeMedical System (Minho Bio-kogyo) or PINPOINT (Styker)            | NA                                                                                                            | Visualization of the right hepatic vein drainage areas and correlation of actual resected liver volumes with estimated liver resection volumes                                                             | 92% (11/12)                                                                 | The right hepatic vein drainage areas were not clearly identified under normal light observation in 6 of the 11 patients (55%)                                                                                                                                                     | Resected liver volume was significantly correlated with the results of preoperative simulation. | None | NA | NA                                                                                                                            | Kubo N, Anaki K, Harimoto N, Ishii N, Takagishi M, Iguchi T, Watanabe A, Shirabe K. J Hepatobiliary Pancreat Sci. 2020 Jul;27(7):571-579. doi: 10.1007/s00678-20-01407-7. |                                                                                                                                          |
| 45 | Ito       | Japan | J Hepatobiliary Pancreat Sci | 2020 | Case series   | Laparoscopic segmentectomy                                       | 3                | ICG | 0.25 mg/5 mL indocyanine                           | PV injection | After puncturing the portal branches                                                                                                      | PINPOINT (Styker) or VESERA ELITE II (Olympus)                           | NA                                                                                                            | Visualization of hepatic segments                                                                                                                                                                          | 100%                                                                        | NA                                                                                                                                                                                                                                                                                 | NA                                                                                              | None | NA | NA                                                                                                                            | Ito D, Ishizawa T, Hasegawa K. J Hepatobiliary Pancreat Sci. 2020 Jul;27(7):441-443. doi: 10.1002/jhps.726.                                                               |                                                                                                                                          |
| 46 | He        | China | Surg Endosc                  | 2020 | RCT           | Hepatectomy for patients with hepatolithiasis                    | 21 (+23 control) | ICG | 0.25mg/kg                                          | IV           | During surgery                                                                                                                            | CPM-1(Key Laboratory of Molecular Imaging of Chinese Academy of Science) | NA                                                                                                            | Operative outcomes                                                                                                                                                                                         | 100% (identification of target liver regions containing CBD stones)         | NA                                                                                                                                                                                                                                                                                 | None                                                                                            | NA   | NA | Compared to traditional laparotomy without a use of the LENS, ICG fluorescence imaging was also used for tumor identification | He K, Hong X, Chi C, Cai C, Wang K, Li P, Liu X, Li J, Shan H, Tan J. Surg Endosc. 2020 Nov;34(11):4875-4882. doi: 10.1007/s00464-019-07290-z.                            |                                                                                                                                          |
| 47 | He        | China | J Gastrointest Surg          | 2020 | Case report   | Laparoscopic segmentectomy                                       | 1                | ICG | NA                                                 | IV           | After occlusion of segment VII Glissonian pedicle                                                                                         | NA                                                                       | NA                                                                                                            | Feasibility                                                                                                                                                                                                | 100%                                                                        | NA                                                                                                                                                                                                                                                                                 | NA                                                                                              | None | NA | NA                                                                                                                            | He JM, Zhen ZP, Ye Q, Mo JQ, Chen GH, Peng JX. J Gastrointest Surg. 2020 May;24(5):1228-1229. doi: 10.1007/s11605-019-04468-7.                                            |                                                                                                                                          |
| 48 | Aoki      | Japan | J Am Coll Surg               | 2020 | Prospective   | Laparoscopic anatomical liver resection                          | 14               | ICG | 0.025mg/mL                                         | PV injection | After puncturing the portal branch under ultrasonoid guidance just before surgery                                                         | PINPOINT (Styker)                                                        | NA                                                                                                            | Visualization of hepatic segments                                                                                                                                                                          | 86%                                                                         | NA                                                                                                                                                                                                                                                                                 | NA                                                                                              | None | NA | NA                                                                                                                            | Aoki T, Kizumen T, Mansour DA, Fujimoto A, Katsuno T, Matsuda K, Tashiro Y, Watanabe M, Onoda K, Murakami M. J Am Coll Surg. 2020 Mar;230(3):e7-e12.                      |                                                                                                                                          |
| 49 | Zhang     | China | Surg Endosc                  | 2020 | Retrospective | Laparoscopic hepatectomy                                         | 30 (+34 control) | ICG | 2.5mg (PV injection) 2.5mg (IV)                    | PV injection | After puncturing the tumor-bearing hepatic segment of the portal branches (PV injection) After clamping the segmental portal pedicle (IV) | PINPOINT (Novadaq)                                                       | NA                                                                                                            | Feasibility and operative outcomeof the novel laparoscopic hepatectomy navigation system (LINS), which fuses preoperative 3D models with ICG fluorescence imaging to achieve real-time surgical navigation | 97% for fluorescence imaging (90% for the LENS)                             | The LINS group had a significantly less blood loss (285.0±163.0 mL vs. 391.1±242.0 mL; P=0.047), less intraoperative blood transfusion rate (13.3% vs. 38.2%; P=0.045), and shorter postoperative hospital stay (7.8±2.1 days vs. 10.6±3.8 days; P<0.001) than the Non-LINS group. | None                                                                                            | NA   | NA | Surgeons' satisfaction and comfort scores were 42 for positive staining and 51 for negative staining (full score: 60)         | Zhang P, Luo H, Zhu W, Yang J, Zeng N, Fan Y, Wen S, Xiang N, Jia F, Fang C. Surg Endosc. 2020 Aug;34(8):3449-3459.                                                       |                                                                                                                                          |
| 50 | Marino    | Spain | HPB (Oxford)                 | 2020 | Retrospective | Robotic-assisted liver resection                                 | 40               | ICG | 0.25mg/mL (PV injection) 2.5mg (IV)                | PV injection | After puncturing the portal branch (PV injection) After clamping the inflow to the target vessels (IV)                                    | da Vinci Firefly (Intuitive Surgical)                                    | (Questionnaire formulated for the investigation of fluorescence image quality and surgeons' comfort was used) | Visualization of hepatic segments and operative outcomes                                                                                                                                                   | 80% for positive staining (PV injection) and 95% for negative staining (IV) | The previously marked transection line was changed after the staining method in 12 out of 40 patients (30%)                                                                                                                                                                        | NA                                                                                              | None | NA | Marino MV, Podda M, Fernandez CC, Ruiz MG, Freitas MG. HPB (Oxford). 2020 Mar;22(3):422-431.                                  |                                                                                                                                                                           |                                                                                                                                          |
| 51 | Utsude    | Japan | Asian J Surg                 | 2020 | Case series   | Laparoscopic anatomical liver resection                          | 3                | ICG | 2.5mg                                              | IV           | After clamping or closing the Glissonian pedicles                                                                                         | 1588 Advanced Imaging Modality (Styker) or VESERA ELITE II (Olympus)     | NA                                                                                                            | Visualization of hepatic segments                                                                                                                                                                          | 100%                                                                        | NA                                                                                                                                                                                                                                                                                 | NA                                                                                              | None | NA | NA                                                                                                                            | Utsude T, Sawa H, Iwamoto Y, Abe T, Fujisaka R, Muneta K, Mii Y, Mori-Imaoka S, Kuroda D. Asian J Surg. 2020 Jun;43(1):362-368.                                           |                                                                                                                                          |

NA, Not available or not assessed
